# Supplementary material
Source: Royal Society of Chemistry journal article supplement (doi:10.1039/d6ma00344c)
Supplement: d6ma00344c1.pdf [file d6ma00344c1.pdf]

**Hydrogen-Bonding Mediated Supramolecular Assembly of Fluorescent Meso-Aryl  
Porphyrins for Creatinine Monitoring in Biological Samples**

Karisma Sharma,<sup>a</sup> Animesh Pal,<sup>b</sup> Satadru Jha,<sup>a</sup> Nilanjan Dey<sup>b\*</sup>

<sup>a</sup>Department of Chemistry, Sikkim Manipal Institute of Technology,  
Sikkim Manipal University, Majitar, Sikkim 737136, India.

<sup>b</sup>Department of Chemistry, BITS-Pilani Hyderabad Campus, Shameerpet, Hyderabad-  
500078, Telangana, India, \*Email: nilanjandey.iisc@gmail.com

## EXPERIMENTAL SECTION

**General:** All chemicals (solvents, reagents, and chemicals) were purchased from the best-known local chemical suppliers and used without further purification. Solvents were distilled and dried before use.

**Spectroscopic studies:** The UV–vis spectroscopic studies were recorded on a Shimadzu model 2100 spectrometer. The slit width for the experiment was kept at 5 nm. The stock solution for creatinine was (10mM). On the other hand, fluorescence experiments were performed in an Eclipse spectrofluorometer. The slit-width for the fluorescence experiment was kept at 5 nm (excitation) and 5 nm (emission), and the excitation wavelength was set at 430 nm.

**Scanning Electron Microscopy:** Solution of probe-1 & probe-2 (concentration 10  $\mu$ M) in PBS buffer medium, then, consecutively, creatinine was added with probes-1 & 2. All three samples were drop-cast over double-sided tapes attached to the brass stubs and air-dried for 48 h. The samples were then coated with gold vapour and analysed on a Quanta 200 SEM operated at 15 kV.

**Dynamic Light Scattering Studies (DLS):** DLS measurements were done using a Malvern Zetasizer NanoZS particle sizer (Malvern Instruments Inc., MA) instrument. Samples (probe-1, probe-2, probe-1 + creatinine, probe-2 + creatinine) were prepared in PBS buffer medium and examined under dust-free conditions. Reported mean hydrodynamic diameters were obtained from Gaussian analysis of the intensity-weighted particle size distributions.

### Design and Synthesis

P-Cyanobenzaldehyde (292 mg, 2.00 mmol), dipyrromethane (277 mg, 2.00 mmol), and  $\text{BF}_3 \cdot \text{Et}_2\text{O}$  (0.378 mL, 3.00 mmol) were dissolved in dry  $\text{CHCl}_3$  (300 mL). After stirring for 2 h at room temperature, 1,2,4,5-tetrachlorobenzoquinone (618 mg, 2.46 mmol) was added. The mixture was stirred for 24 h, filtered through silica gel, concentrated, and purified by column chromatography ( $\text{CHCl}_3$ ) to afford a purple powder (156 mg, 0.30 mmol, 15% yield).

The probes were synthesised according to the reported literature methods below.

### References:

1. Liu, X., Li, H., Zhang, Y., Xu, B., Xia, H., & Mu, Y. Enhanced carbon dioxide uptake by metalloporphyrin-based microporous covalent triazine framework. *Polymer Chemistry*, 2013, 4(8), 2445-2448.
2. H. Lee, H. Park, D. Y. Ryu, W. D. Jang, *Chem. Soc. Rev.* 2023, **52**, 1947.

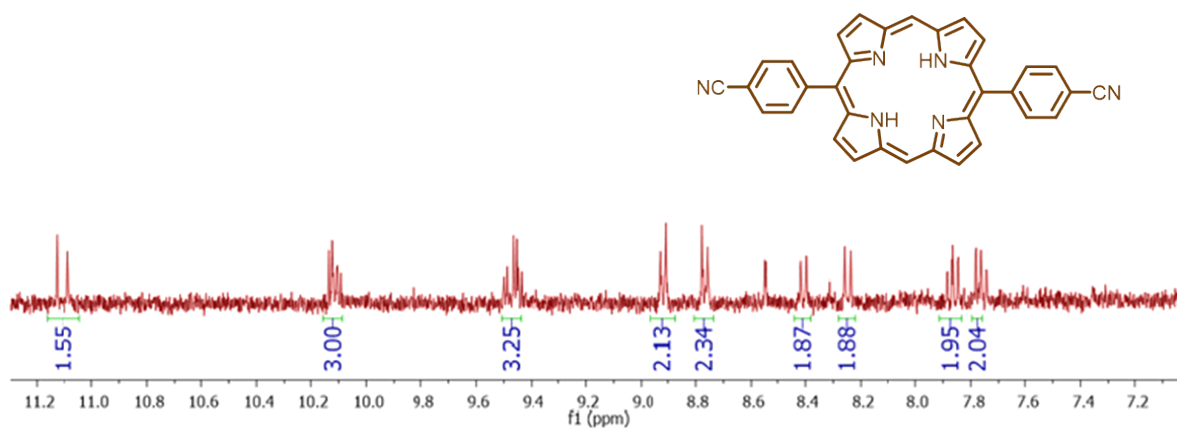

Figure S1:  $^1\text{H}$  NMR data of probe 1 in DMSO- $d_6$  medium.

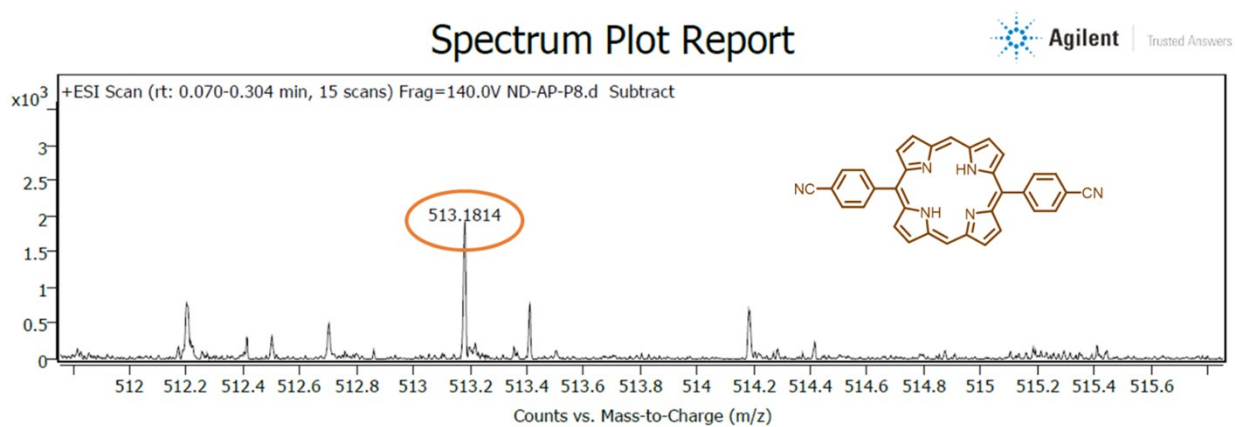

Figure S2: HRMS spectra of probe 1.

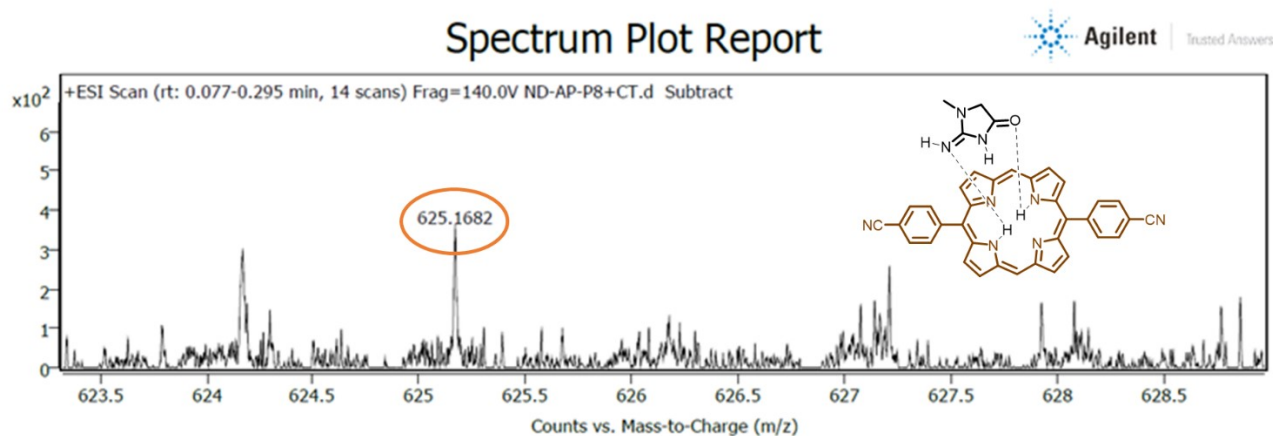

Figure S3: HRMS spectra of probe 1 with creatinine.

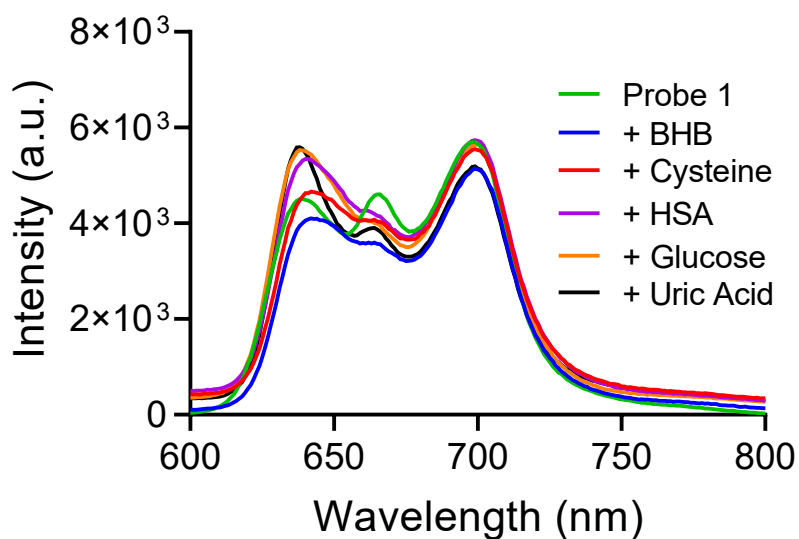

Figure S4: Fluorescence spectra of **1** (10  $\mu\text{M}$ ,  $\lambda_{\text{ex}} = 440 \text{ nm}$ ) with bioanalytes (50  $\mu\text{M}$ ) in in pH 7 buffered medium.

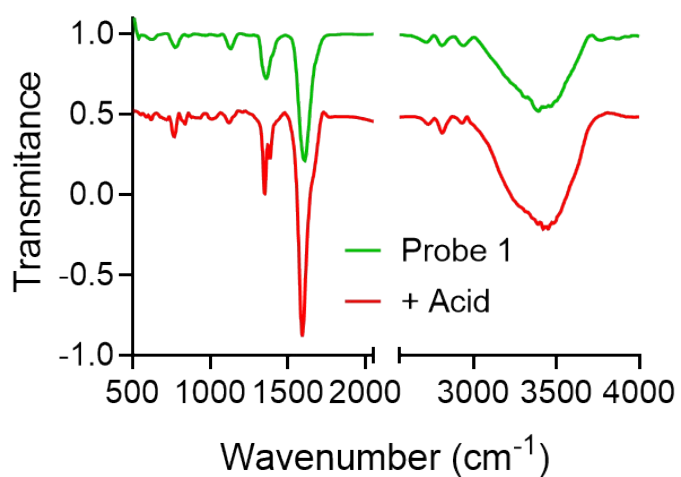

Figure S5: FT-IR spectra of Probe 1 with acid (HCl).

| Name                       | Size (d. nm.) |
|----------------------------|---------------|
| Probe -1 in water at 40 °C | 150 $\pm$ 8   |
| at 50 °C                   | 101 $\pm$ 10  |
| at 60 °C                   | 89 $\pm$ 7    |

Table T1: Temperature-dependent DLS spectra of probe **1** in water medium.

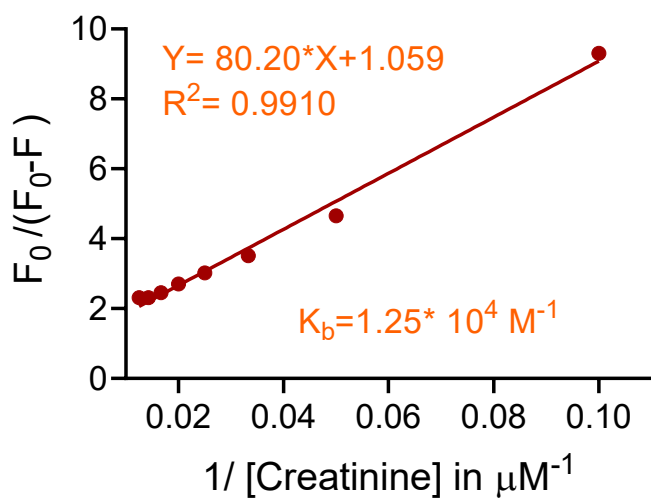

Figure S6: Linear Benesi–Hildebrand plot for the determination of the binding constant of probe 1 with creatinine.

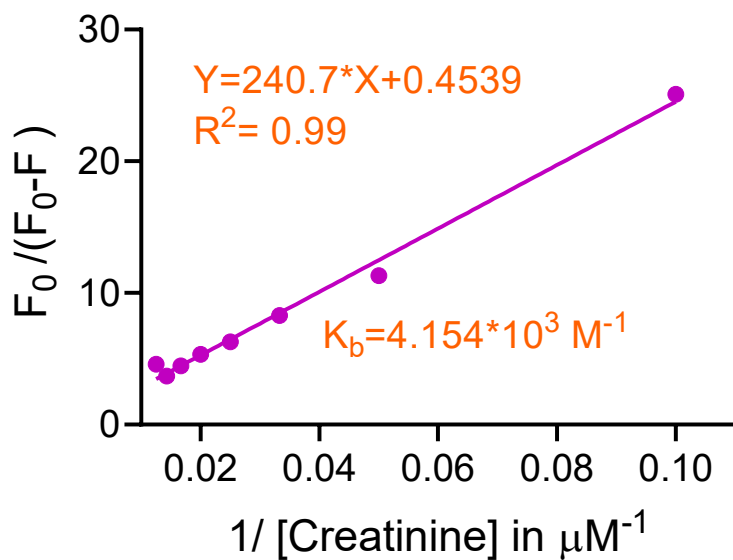

Figure S7: Linear Benesi–Hildebrand plot for the determination of the binding constant of probe 2 with creatinine.
